# Supplementary material for: Predominance of BRCA2 Mutation and Estrogen Receptor Positivity in Unselected Breast Cancer with BRCA1 or BRCA2 Mutation
Source: MDPI journal article supplement (doi:10.3390/cancers14133266), 2022-07-04
Supplement: s1 [file s1]

# Supplemental data

## Summary

|                                                                                                                                         |    |
|-----------------------------------------------------------------------------------------------------------------------------------------|----|
| Figure S1. Subgroup analysis of progression free survival in ER+ gBRCAbreast cancer patients treated with PARPi in phase III trial..... | 2  |
| Figure S2. Quoron flowchart .....                                                                                                       | 3  |
| Table S1: Frequency of gBRCA1 and gBRCA2 carriers in unselected breast cancer .....                                                     | 3  |
| Table S2. Frequency of gBRCA1 and gBRCA2 carriers by ER status in unselected breast cancer.....                                         | 6  |
| Table S3. Frequency of gBRCA carriers in unaffected individuals .....                                                                   | 6  |
| Table S4. Frequency of gBRCA carriers in gnomAD* exome sequencing database** .....                                                      | 7  |
| Table S5. Meta-analysis of gBRCA carriers in unselected breast cancer .....                                                             | 2  |
| Table S6. Meta-analysis of gBRCA carriers in ER+ breast cancer.....                                                                     | 2  |
| Table S7. Meta-analysis of gBRCA in ER- breast cancer.....                                                                              | 10 |
| Table S8. Meta-analysis of gBRCAin unaffected individuals .....                                                                         | 12 |
| Table S9. Meta-analysis of gBRCA1 carriers in unselected breast cancer .....                                                            | 13 |
| Table S10. Meta-analysis of gBRCA2 carriers in unselected breast cancer .....                                                           | 14 |
| Table S11. Meta-analysis of gBRCA1 carriers among unaffected individuals .....                                                          | 14 |
| Table S12. Meta-analysis of gBRCA2 carriers in unaffected individuals .....                                                             | 16 |

**Figure S1. Subgroup analysis of progression-free survival in ER+ gBRCA breast cancer treated with a PARPi in a phase III trial**

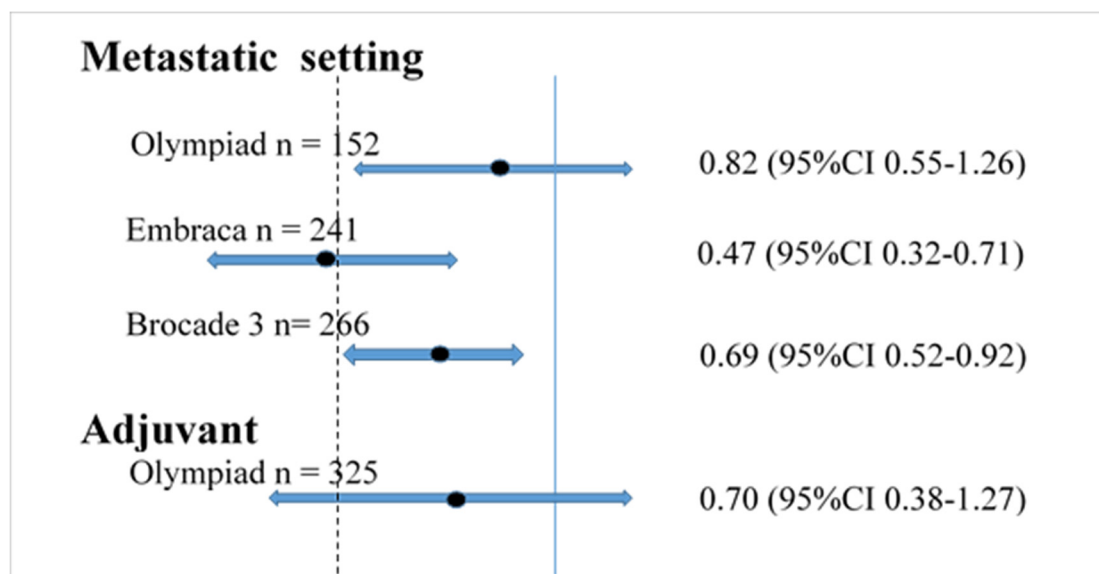

Figure S2. Quoron flowchart

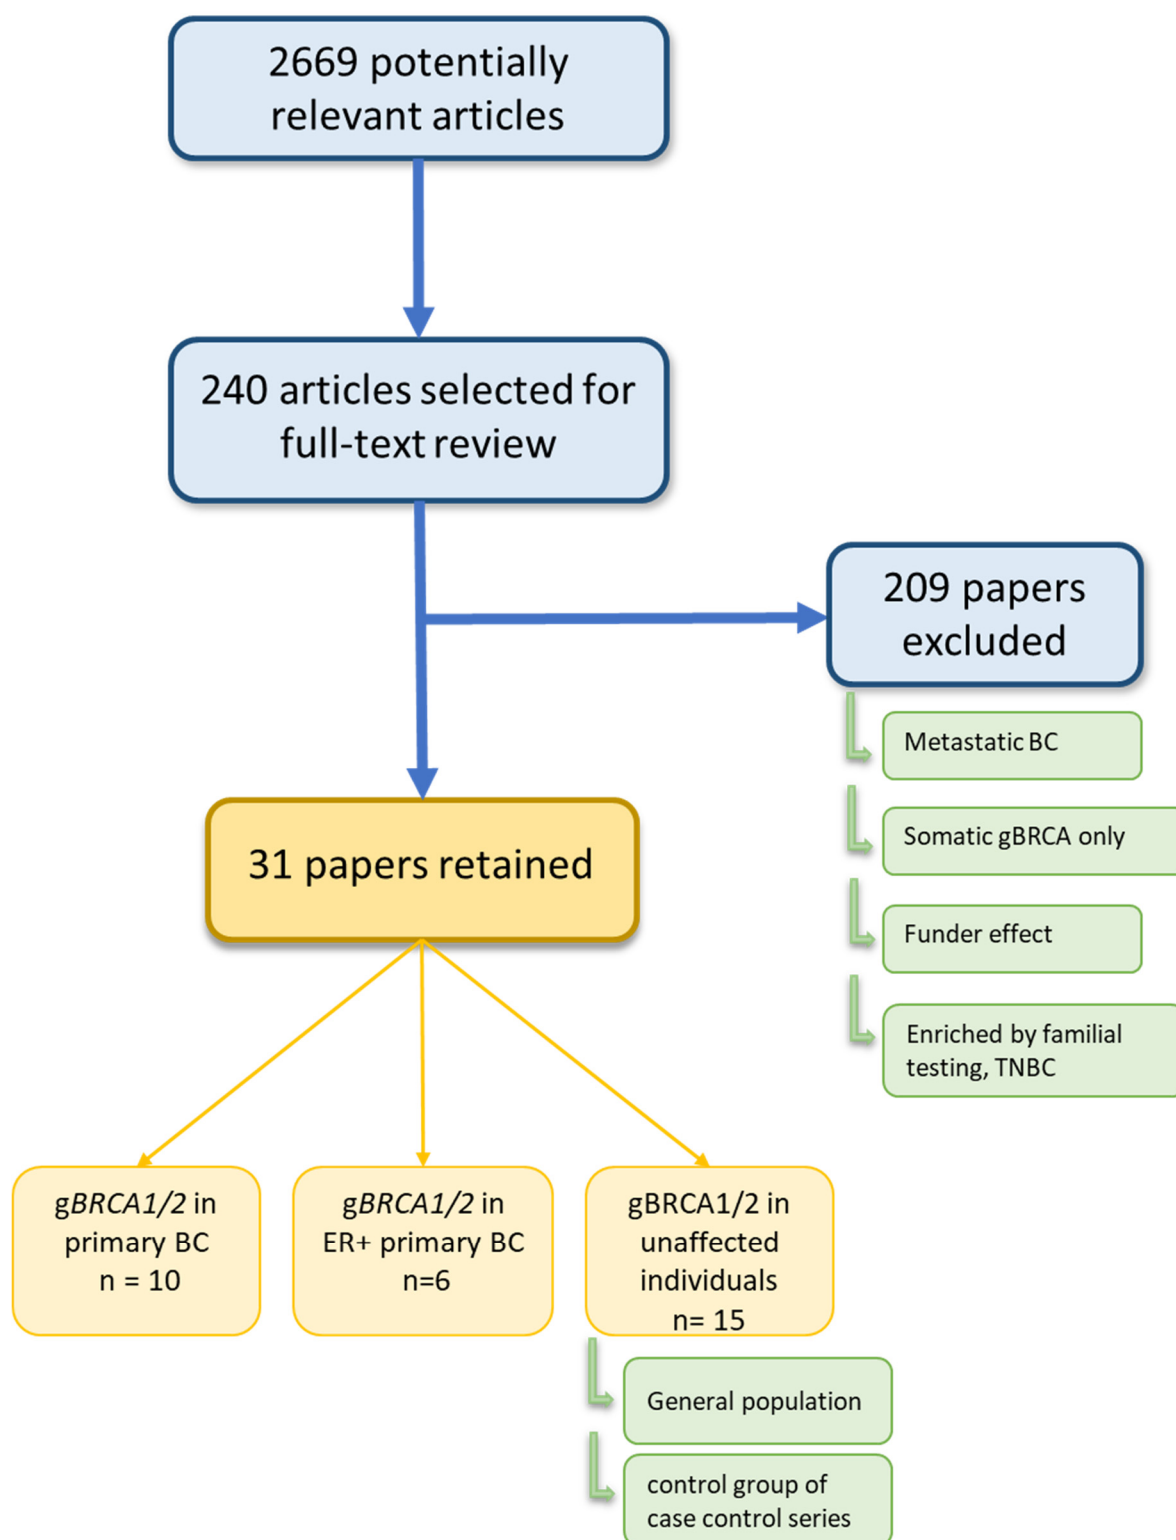

BC, breast cancer

**Table S1: Frequency of gBRCA1 and gBRCA2 carriers among unselected breast cancer patients**

| Study          | Breast cancer<br>n | BRCA1<br>n         | BRCA2<br>n         |
|----------------|--------------------|--------------------|--------------------|
| Tung 2016      | 488                | 18                 | 12                 |
| Hu 2021        | 32,247             | 275                | 417                |
| Chen 2020      | 524                | 11                 | 18                 |
| Pereira 2016*  | 2433               | 30                 | 33                 |
| Beitsch 2019   | 959                | 2                  | 13                 |
| Abugattas 2015 | 266                | 11                 | 2                  |
| Li 2019        | 5,099              | 50                 | 42                 |
| Malone 2006    | 1,628              | 52                 | 44                 |
| Kurian 2019    | 18,522             | 536                | 477                |
| Dorling 2021   | 48,826             | 515                | 754                |
| <b>Total</b>   | <b>108,699</b>     | <b>1,496 (46%)</b> | <b>1,776 (54%)</b> |

\* from tumor mutation study;

1. Tung, N.; Lin, N.U.; Kidd, J.; Allen, B.A.; Singh, N.; Wenstrup, R.J.; Hartman, A.-R.; Winer, E.P.; Garber, J.E. Frequency of Germline Mutations in 25 Cancer Susceptibility Genes in a Sequential Series of Patients With Breast Cancer. *J. Clin. Oncol.* **2016**, *34*, 1460–1468.
2. Hu, C.; Hart, S.N.; Gnanaolivu, R.; Huang, H.; Lee, K.Y.; Na, J.; Gao, C.; Lilyquist, J.; Yadav, S.; Boddicker, N.J.; et al. A Population-Based Study of Genes Previously Implicated in Breast Cancer. *N. Engl. J. Med.* **2021**, *384*, 440–451.
3. Chen, B.; Zhang, G.; Li, X.; Ren, C.; Wang, Y.; Li, K.; Mok, H.; Cao, L.; Wen, L.; Jia, M.; et al. Comparison of BRCA versus Non-BRCA Germline Mutations and Associated Somatic Mutation Profiles in Patients with Unselected Breast Cancer. *Aging* **2020**, *12*, 3140–3155.
4. Pereira, B.; Chin, S.-F.; Rueda, O.M.; Vollan, H.-K.M.; Provenzano, E.; Bardwell, H.A.; Pugh, M.; Jones, L.; Russell, R.; Sammut, S.-J.; et al. The Somatic Mutation Profiles of 2,433 Breast Cancers Refines Their Genomic and Transcriptomic Landscapes. *Nat. Commun.* **2016**, *7*, 11479.
5. Beitsch, P.D.; Whitworth, P.W.; Hughes, K.; Patel, R.; Rosen, B.; Compagnoni, G.; Baron, P.; Simmons, R.; Smith, L.A.; Grady, I.; et al. Underdiagnosis of Hereditary Breast Cancer: Are Genetic Testing Guidelines a Tool or an Obstacle? *J. Clin. Oncol.* **2019**, *37*, 453–460.
6. Abugattas, J.; Llacuachaqui, M.; Allende, Y.S.; Velásquez, A.A.; Velarde, R.; Cotrina, J.; Garcés, M.; León, M.; Calderón, G.; de la Cruz, M.; et al. Prevalence of BRCA1 and BRCA2 Mutations in Unselected Breast Cancer Patients from Peru. *Clin. Genet.* **2015**, *88*, 371–375.
7. Li, J.; Wen, W.X.; Eklund, M.; Kvist, A.; Eriksson, M.; Christensen, H.N.; Torstensson, A.; Bajalica-Lagercrantz, S.; Dunning, A.M.; Decker, B.; et al. Prevalence of BRCA1 and BRCA2

Pathogenic Variants in a Large, Unselected Breast Cancer Cohort. *Int. J. Cancer* **2019**, *144*, 1195–1204.

8. Malone, K.E.; Daling, J.R.; Doody, D.R.; Hsu, L.; Bernstein, L.; Coates, R.J.; Marchbanks, P.A.; Simon, M.S.; McDonald, J.A.; Norman, S.A.; et al. Prevalence and Predictors of BRCA1 and BRCA2 Mutations in a Population-Based Study of Breast Cancer in White and Black American Women Ages 35 to 64 Years. *Cancer Res.* **2006**, *66*, 8297–8308.
9. Kurian, A.W.; Ward, K.C.; Howlader, N.; Deapen, D.; Hamilton, A.S.; Mariotto, A.; Miller, D.; Penberthy, L.S.; Katz, S.J. Genetic Testing and Results in a Population-Based Cohort of Breast Cancer Patients and Ovarian Cancer Patients. *J. Clin. Oncol.* **2019**, *37*, 1305–1315.
10. Breast Cancer Association Consortium; Dorling, L.; Carvalho, S.; Allen, J.; González-Neira, A.; Luccarini, C.; Wahlström, C.; Pooley, K.A.; Parsons, M.T.; Fortuno, C.; et al. Breast Cancer Risk Genes - Association Analysis in More than 113,000 Women. *N. Engl. J. Med.* **2021**, *384*, 428–439.

**Table S2. Frequency of gBRCA1 and gBRCA2 carriers by ER status among unselected breast cancer patients**

| Study               | Country/<br>Ethnicities                                                                                               | ER+ *        | BRCA1/<br>ER+<br>n | BRCA2/<br>ER+<br>n | ER-          | BRCA1/<br>ER-<br>n | BRCA2/<br>ER-<br>n |
|---------------------|-----------------------------------------------------------------------------------------------------------------------|--------------|--------------------|--------------------|--------------|--------------------|--------------------|
| <b>Tung 2016</b>    | United States: Boston, MA<br>/<br>7.8% Ashkenazi Jewish<br>81.4% non-Ashkenazi white                                  | 364          | 5                  | 11                 | 124          | 13                 | 1                  |
| <b>Hu 2021</b>      | United States:<br>4% Asian,<br>12.3% Non-Hispanic black,<br>3.2% Hispanic,<br>78.9% Non-Hispanic white,<br>1.7% Other | 18,428       | 73                 | 201                | 3805         | 114                | 82                 |
| <b>Chen 2020</b>    | South China                                                                                                           | 363          | 4                  | 15                 | 139          | 7                  | 1                  |
| <b>Li 2019</b>      | Sweden : Stockholm                                                                                                    | 3637         | 17                 | 30                 | 643          | 30                 | 7                  |
| <b>Kurian 2019</b>  | United States: California and<br>Georgia                                                                              | 11642        | 227                | 365                | 7060         | 309                | 112                |
| <b>Dorling 2021</b> | 16 European countries,<br>5 Asian countries,<br>3 American countries<br>2 Oceania countries                           | <u>30466</u> | 120                | 446                | 7766         | 269                | 149                |
| <b>TOTAL</b>        |                                                                                                                       | <b>66680</b> | <b>457</b>         | <b>1085</b>        | <b>20190</b> | <b>761</b>         | <b>368</b>         |

\* including ER+PR- and ER+HER2+++ tumors;

**Table S3. Frequency of gBRCA carriers among unaffected individuals**

| Type of study                     | Type of<br>analysis       | n                          | BRCA1                        | BRCA2                        | Reference                |
|-----------------------------------|---------------------------|----------------------------|------------------------------|------------------------------|--------------------------|
| <b>Genome-wide<br/>population</b> |                           |                            |                              |                              |                          |
|                                   | exome                     | 50,726                     | 95 (36%)                     | 172 (64%)                    | Manickam 2018            |
|                                   | exome                     | 30,223                     | 86 (39%)                     | 131 (61%)                    | Abul-Husn 2020           |
| <b>Bio bank data</b>              |                           |                            |                              |                              |                          |
|                                   | exome and<br>whole genome | 125,747                    | 332 (43%)                    | 447 (57%)                    | gnomAD<br>Karczewski2020 |
| <b>Case-control</b>               |                           |                            |                              |                              |                          |
|                                   | large panel               | 32,544                     | 37(32%)                      | 78 (68%)                     | Hu2020<br>(CARRIERS)     |
|                                   | large panel               | 50,703                     | 58 (30%)                     | 135 (70%)                    | Dorling 2021             |
| <b>Total</b>                      |                           | <b>238,973<br/>(1/173)</b> | <b>550 (40%)<br/>(1/434)</b> | <b>828 (60%)<br/>(1/288)</b> |                          |

\*<https://gnomad.broadinstitute.org>;

**Table S4. Frequency of gBRCA carriers in gnomAD\* exome sequencing database\*\***

|                                    | Count |       | BRCA ratio |       | Prevalence |       |       | BRCA type prevalence difference |
|------------------------------------|-------|-------|------------|-------|------------|-------|-------|---------------------------------|
|                                    | BRCA1 | BRCA2 | BRCA1      | BRCA2 | BRCA1/2    | BRCA1 | BRCA2 | P value***                      |
| <b>Complete cohort (n=125,747)</b> |       |       |            |       |            |       |       |                                 |
|                                    | 332   | 447   | 43%        | 57%   | 0.62%      | 0.26% | 0.36% | 2*10-5                          |
| <b>Female cohort (n=57,786)</b>    |       |       |            |       |            |       |       |                                 |
|                                    | 152   | 219   | 41%        | 59%   | 0.64%      | 0.26% | 0.38% | 3*10-4                          |
| <b>Male cohort (n=67,21961)</b>    |       |       |            |       |            |       |       |                                 |
|                                    | 180   | 228   | 44%        | 56%   | 0.60%      | 0.26% | 0.34% | 1*10-2                          |

\*v2.1.12; \*\*using ClinVar August 2021. This database contains 7268 constitutive samples of individuals with cancer (5.7% of total, 3332 males and 3936 females). \*\*\*μFisher's exact test

## References

1. Landrum, M.J.; Lee, J.M.; Benson, M.; Brown, G.R.; Chao, C.; Chitipiralla, S.; Gu, B.; Hart, J.; Hoffman, D.; Jang, W.; et al. ClinVar: Improving Access to Variant Interpretations and Supporting Evidence. *Nucleic Acids Res.* **2018**, *46*, D1062–D1067.
2. Karczewski, K.J.; Francioli, L.C.; Tiao, G.; Cummings, B.B.; Alföldi, J.; Wang, Q.; Collins, R.L.; Laricchia, K.M.; Ganna, A.; Birnbaum, D.P.; et al. The Mutational Constraint Spectrum Quantified from Variation in 141,456 Humans. *Nature* **2020**, *581*, 434–443.

**Table S5. Meta-analysis of gBRCA carriers among unselected breast cancer patients**

**Data**

|    | Study Name     | Events | Sample size | Event rate | Logitevent rate | Std Err      |
|----|----------------|--------|-------------|------------|-----------------|--------------|
| 1  | Tung 2016      | 30     | 488         | 0.061      | -2.726          | <b>0.188</b> |
| 2  | Hu 2021        | 692    | 32247       | 0.021      | -3.820          | <b>0.038</b> |
| 3  | Chen 2020      | 29     | 524         | 0.055      | -2.837          | <b>0.191</b> |
| 4  | Pereira 2016   | 63     | 2433        | 0.026      | -3.628          | <b>0.128</b> |
| 5  | Beitsch 2019   | 15     | 959         | 0.016      | -4.142          | <b>0.260</b> |
| 6  | Abugattas 2015 | 13     | 266         | 0.049      | -2.968          | <b>0.284</b> |
| 7  | Li 2019        | 92     | 5099        | 0.018      | -3.997          | <b>0.105</b> |
| 8  | Malone 2006    | 96     | 1628        | 0.059      | -2.770          | <b>0.105</b> |
| 9  | Kurian 2019    | 1013   | 18522       | 0.055      | -2.850          | <b>0.032</b> |
| 10 | Dorling 2021   | 1269   | 48826       | 0.026      | -3.624          | <b>0.028</b> |

**Results**

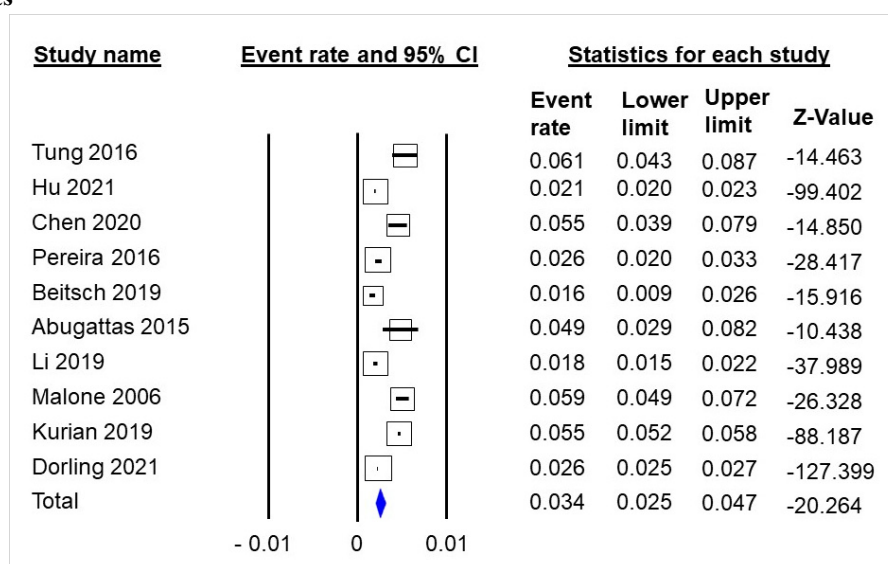

Heterogeneity analysis:

I2 statistic (%)= 94.7, Phet =0.000 (I2>40% p<0.05) → heterogeneity → random-effects model

Forest plot: gBRCA=3.4%, 95% CI 2.5-4.7

**Selection Bias**

|           |             |                            | Random        |                      |
|-----------|-------------|----------------------------|---------------|----------------------|
| N studies | Eggers Test | Duval &Tweedie (DT) Method | DT Event rate | DT event rate IC 95% |
| 10        | 0.88        | 0                          | 0.034         | 0.025 – 0.047        |

*Funnel plot log gBRCA*



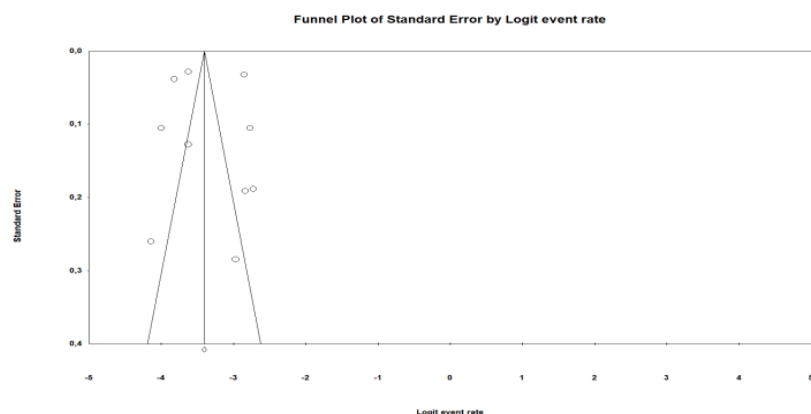

Results based on 10 studies retained (open circles). No additional studies identified by “trim and fill” (Egger et al, 1997; Duval & Tweedie, 2000). Egger’s test does not show publication bias ( $p=0.88$ ).

**Table S6. Meta-analysis of gBRCA carriers among ER+ breast cancer patients**

#### Data

|   | Study Name   | Events | Sample size | Event rate | Logitevent rate | Std Err      |
|---|--------------|--------|-------------|------------|-----------------|--------------|
| 1 | Tung 2016    | 16     | 364         | 0.044      | -3.080          | <b>0.256</b> |
| 2 | Hu 2021      | 274    | 18428       | 0.015      | -4.194          | <b>0.061</b> |
| 3 | Chen 2020    | 19     | 363         | 0.052      | -2.896          | <b>0.236</b> |
| 4 | Pereira 2016 | 28     | 1780        | 0.016      | -4.136          | <b>0.190</b> |
| 5 | Li 2019      | 47     | 3637        | 0.013      | -4.336          | <b>0.147</b> |
| 6 | Kurian 2019  | 592    | 11642       | 0.051      | -2.927          | <b>0.042</b> |
| 7 | Dorling 2021 | 566    | 30466       | 0.019      | -3.967          | <b>0.042</b> |

#### Results

| <u>Study name</u> | <u>Event rate and 95% CI</u> | <u>Statistics for each study</u> |             |             |         |
|-------------------|------------------------------|----------------------------------|-------------|-------------|---------|
|                   |                              | Event rate                       | Lower limit | Upper limit | Z-Value |
| Tung 2016         |                              | 0.044                            | 0.027       | 0.071       | -12.045 |
| Hu 2021           |                              | 0.015                            | 0.013       | 0.017       | -68.897 |
| Chen 2020         |                              | 0.052                            | 0.034       | 0.081       | -12.897 |
| Pereira 2016      |                              | 0.016                            | 0.011       | 0.023       | -21.714 |
| Li 2019           |                              | 0.013                            | 0.010       | 0.017       | -29.532 |
| Kurian 2019       |                              | 0.051                            | 0.047       | 0.055       | -69.375 |
| Dorling 2021      |                              | 0.019                            | 0.017       | 0.020       | -93.498 |
| Total             |                              | 0.025                            | 0.015       | 0.041       | -14.004 |

#### Heterogeneity analysis:

$I^2$  statistic (%) = 98.7,  $P_{het} = 0.000$  ( $I^2 > 40\%$   $p < 0.05$ ) → heterogeneity → random-effects model

#### Forest plot:

gBRCA = 2.5%, 95% CI 1.5-4.1

## Selection Bias

|           |             |                             | Adjusted value : Random |                      |
|-----------|-------------|-----------------------------|-------------------------|----------------------|
| N studies | Eggers Test | Duval & Tweedie (DT) Method | DT Event rate           | DT event rate IC 95% |
| 7         | 0.77        | 1                           | 0.022                   | 0.014 – 0.036        |

## Funnel plot log gBRCA

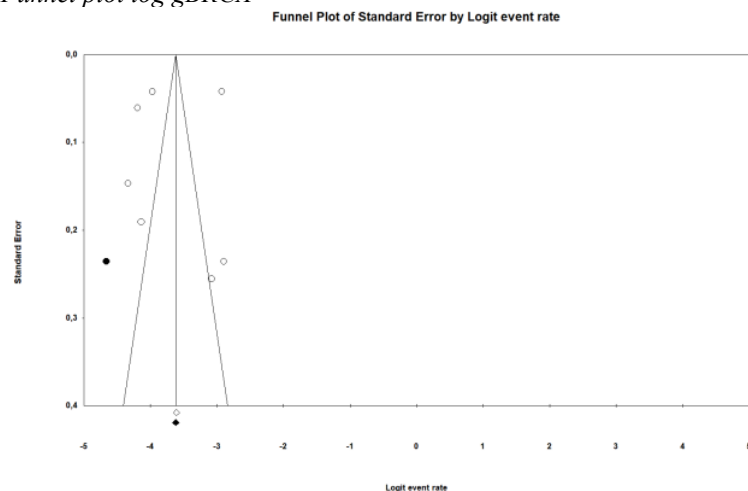

Results based on 7 studies retained (open circles). 1 additional study identified by “trim and fill” analysis (Egger et al, 1997; Duval & Tweedie, 2000). Egger’s test does not show publication bias ( $p=0.77$ ).

**Table S7. Meta-analysis of gBRCA carriers among ER- breast cancer patients**

## Data

|   | Study Name   | Events | Sample size | Event rate | Logitevent rate | Std Err      |
|---|--------------|--------|-------------|------------|-----------------|--------------|
| 1 | Tung 2016    | 14     | 124         | 0.113      | -2.061          | <b>0.284</b> |
| 2 | Hu 2021      | 196    | 3805        | 0.052      | -2.913          | <b>0.073</b> |
| 3 | Chen 2020    | 8      | 139         | 0.058      | -2.796          | <b>0.364</b> |
| 4 | Pereira 2016 | 35     | 653         | 0.054      | -2.871          | <b>0.174</b> |
| 5 | Li 2019      | 37     | 643         | 0.058      | -2.796          | <b>0.169</b> |
| 6 | Kurian 2019  | 421    | 7060        | 0.060      | -2.758          | <b>0.050</b> |
| 7 | Dorling 2021 | 418    | 7766        | 0.054      | -2.867          | <b>0.050</b> |

## Results

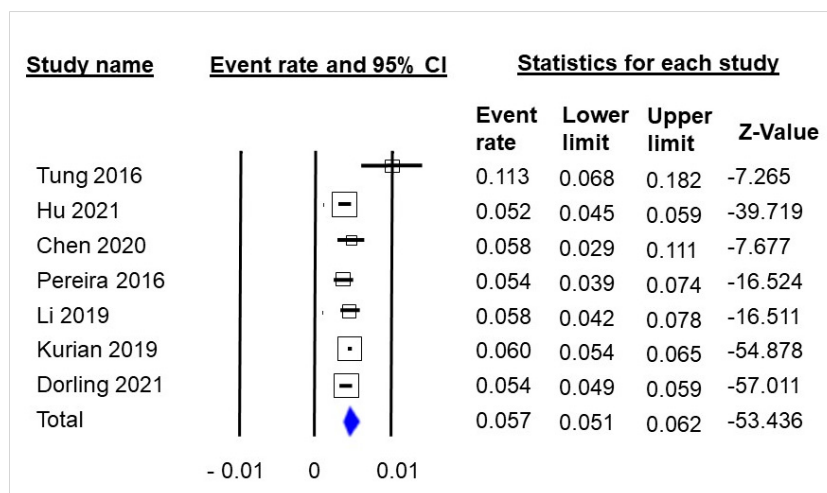

#### Heterogeneity analysis:

$I^2$  statistic (%) = 46.6,  $P_{het} = 0.0810 \rightarrow$  heterogeneity  $\rightarrow$  random-effects model

#### Forest plot:

gBRCA = 5.7%, 95% CI 5.1-6.2

#### Selection Bias

| Adjusted value : Random |             |                             |               |                      |
|-------------------------|-------------|-----------------------------|---------------|----------------------|
| N studies               | Eggers Test | Duval & Tweedie (DT) Method | DT Event rate | DT event rate IC 95% |
| 7                       | 0.43        | 0                           | 0.057         | 0.051 – 0.062        |

#### Funnel plot log gBRCA

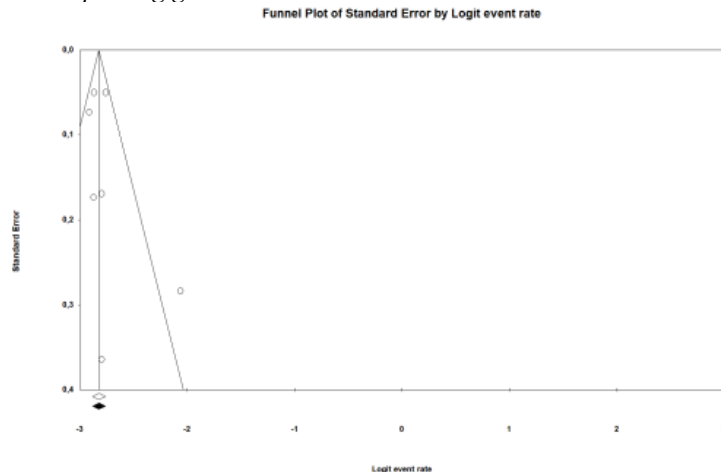

Results based on 7 studies retained (open circles). 1 additional study identified by “trim and fill” analysis (Egger et al, 1997; Duval & Tweedie, 2000). Egger’s test does not show publication bias ( $p=0.43$ ).

**Table S8. Meta-analysis of gBRCA carriers among unaffected individuals**

**Data**

|   | Study Name                              | Events | Sample size | Event rate | Logitevent rate | Std Err      |
|---|-----------------------------------------|--------|-------------|------------|-----------------|--------------|
| 1 | Genome-wide population / Manickam       | 267    | 50726       | 0.005      | -5.242          | <b>0.061</b> |
| 2 | Genome-wide population / Abul-Husn      | 217    | 30223       | 0.007      | -4.929          | <b>0.068</b> |
| 3 | Bio bank data / Karczewski 2020         | 779    | 125747      | 0.006      | -5.078          | <b>0.036</b> |
| 4 | Case-control large panel / Hu 2021      | 115    | 32544       | 0.004      | -5.642          | <b>0.093</b> |
| 5 | Case-control large panel / Dorling 2021 | 193    | 50703       | 0.004      | -5.567          | <b>0.072</b> |

**Results**

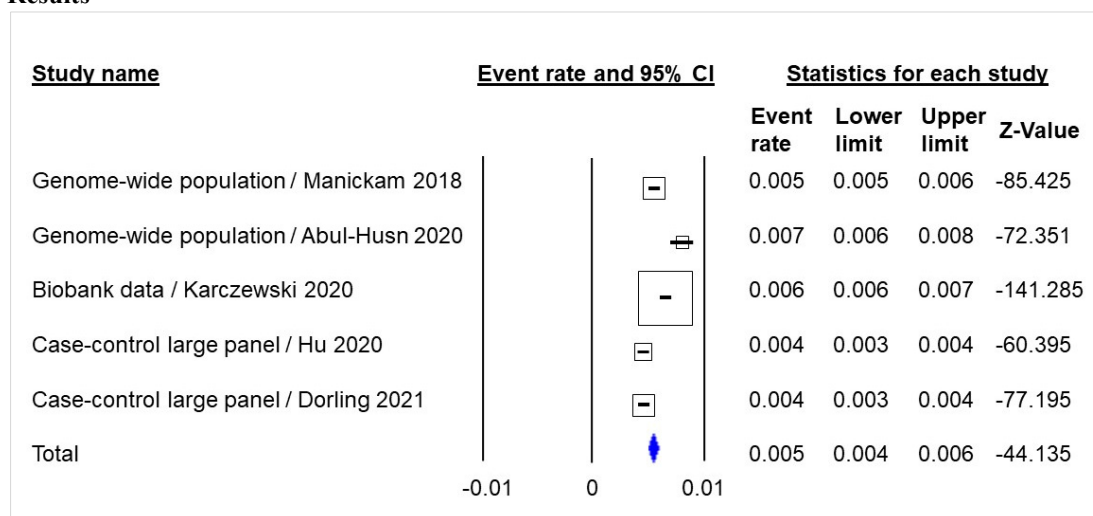

Heterogeneity analysis:

$I^2$  statistic (%) = 94.7,  $P_{het} = 0.000 \rightarrow$  heterogeneity  $\rightarrow$  random-effects model

Forest plot:

gBRCA=0.5%, 95% CI 0.4-0.6

**Selection Bias**

|           |             |                             | Adjusted value : Random |                      |
|-----------|-------------|-----------------------------|-------------------------|----------------------|
| N studies | Eggers Test | Duval & Tweedie (DT) Method | DT Event rate           | DT event rate IC 95% |
| 5         | 0.23        | 0                           | 0.005                   | 0.004 – 0.006        |

*Funnel plot log gBRCA*

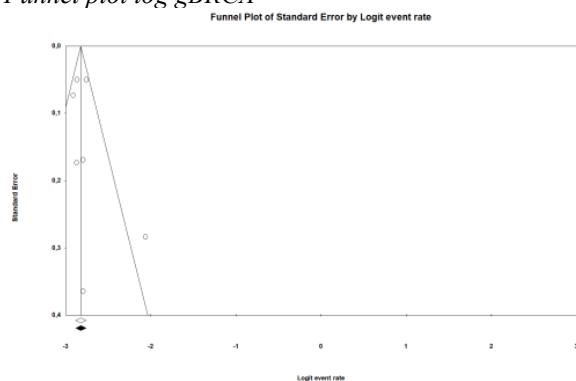

Results based on 5 studies or databases retained (open circles). No additional study identified by “trim and fill” analysis (Egger et al, 1997; Duval & Tweedie, 2000). Egger’s test does not show publication bias ( $p=0.23$ ).

**Table S9. Meta-analysis of gBRCA1 carriers among unselected breast cancer patients**

**Data**

|    | Study Name     | Events | Sample size | Event rate | Logitevent rate | Std Err      |
|----|----------------|--------|-------------|------------|-----------------|--------------|
| 1  | Tung 2016      | 18     | 488         | 0.037      | -3.262          | <b>0.240</b> |
| 2  | Hu 2021        | 275    | 32247       | 0.009      | -4.756          | <b>0.061</b> |
| 3  | Chen 2020      | 11     | 524         | 0.021      | -3.842          | <b>0.305</b> |
| 4  | Pereira 2016   | 30     | 2433        | 0.012      | -4.383          | <b>0.184</b> |
| 5  | Beitsch 2019   | 2      | 959         | 0.002      | -6.171          | <b>0.708</b> |
| 6  | Abugattas 2015 | 11     | 266         | 0.041      | -3.143          | <b>0.308</b> |
| 7  | Li 2019        | 50     | 5099        | 0.010      | -4.615          | <b>0.142</b> |
| 8  | Malone 2006    | 52     | 1628        | 0.032      | -3.411          | <b>0.141</b> |
| 9  | Kurian 2019    | 536    | 18522       | 0.029      | -3.513          | <b>0.044</b> |
| 10 | Dorling 2021   | 515    | 48826       | 0.011      | -4.541          | <b>0.044</b> |

**Results**

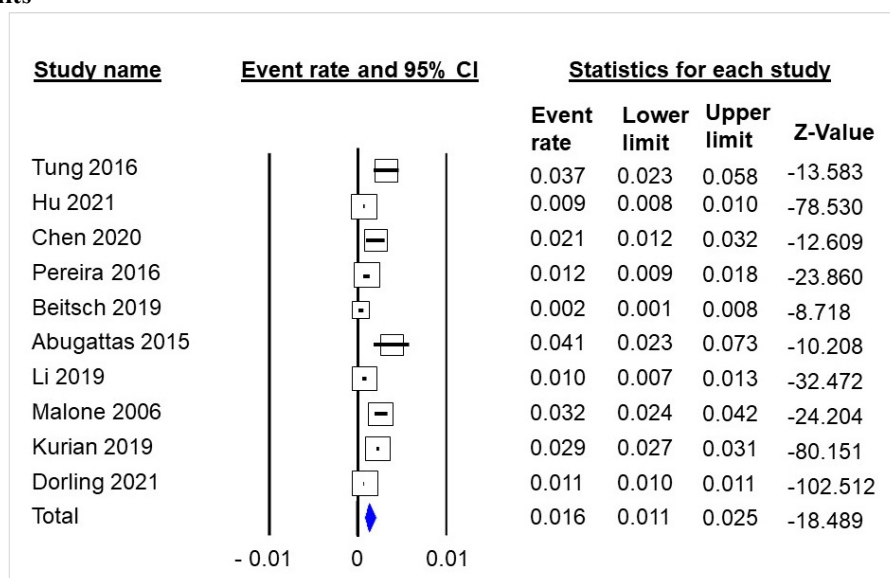

Heterogeneity analysis:

$I^2$  statistic (%)= 98,  $P_{het}$ 0.000 ( $I^2 > 40\%$   $p < 0.05$ ) → heterogeneity → random-effects model

Forest plot:

gBRCA1=1.66%, 95% CI 1.08-2.54

**Selection Bias**

| N studies | Eggers Test | Duval & Tweedie (DT) Method | Random        |                      |
|-----------|-------------|-----------------------------|---------------|----------------------|
|           |             |                             | DT Event rate | DT event rate IC 95% |
| 10        | 0.92        | 0                           | 0.0166        | 0.0108 – 0.0254      |

*Funnel plot log gBRCA1*

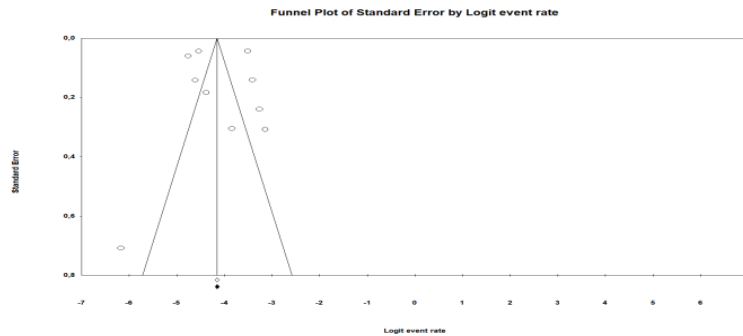

Results based on 10 studies retained (open circles). No additional study identified by “trim and fill” analysis (Egger et al, 1997; Duval & Tweedie, 2000). Egger’s test does not show publication bias ( $p=0.92$ ).

**Table S10. Meta-analysis of gBRCA2 carriers among unselected breast cancer patients**

#### Data

|    | Study Name     | Events | Sample size | Event rate | Logitevent rate | Std Err      |
|----|----------------|--------|-------------|------------|-----------------|--------------|
| 1  | Tung 2016      | 12     | 488         | 0.025      | -3.681          | <b>0.292</b> |
| 2  | Hu 2021        | 417    | 32247       | 0.013      | -4.335          | <b>0.049</b> |
| 3  | Chen 2020      | 18     | 524         | 0.034      | -3.336          | <b>0.240</b> |
| 4  | Pereira 2016   | 33     | 2433        | 0.014      | -4.287          | <b>0.175</b> |
| 5  | Beitsch 2019   | 13     | 959         | 0.014      | -4.287          | <b>0.279</b> |
| 6  | Abugattas 2015 | 2      | 266         | 0.008      | -4.883          | <b>0.710</b> |
| 7  | Li 2019        | 42     | 5099        | 0.008      | -4.791          | <b>0.155</b> |
| 8  | Malone 2006    | 44     | 1628        | 0.027      | -3.584          | <b>0.153</b> |
| 9  | Kurian 2019    | 477    | 18522       | 0.026      | -3.633          | <b>0.046</b> |
| 10 | Dorling 2021   | 754    | 48826       | 0.015      | -4.155          | <b>0.037</b> |

#### Results:

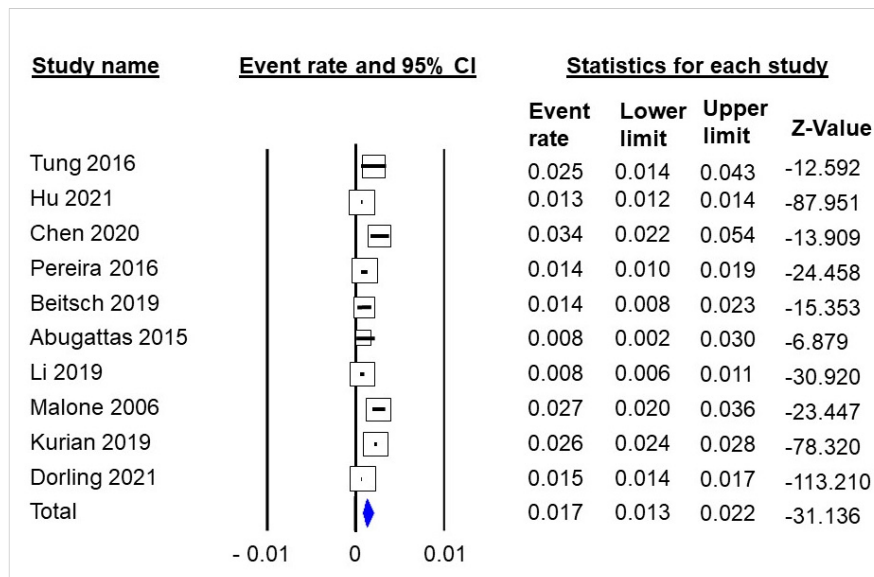

#### Heterogeneity analysis:

$I^2$  statistic (%) = 94.7,  $P_{het}=0.000$  ( $I^2>40\%$   $p<0.05$ ) )  $\rightarrow$  heterogeneity  $\rightarrow$  random-effects model

#### Forest plot:

gBRCA2=1.71%, 95% CI 1.33-2.2

## Selection Bias

|           |             |                             | Random        |                      |
|-----------|-------------|-----------------------------|---------------|----------------------|
| N studies | Eggers Test | Duval & Tweedie (DT) Method | DT Event rate | DT event rate IC 95% |
| 10        | 0.99        | 0                           | 0.017         | 0.0133 – 0.022       |

## Funnel plot log gBRCA2

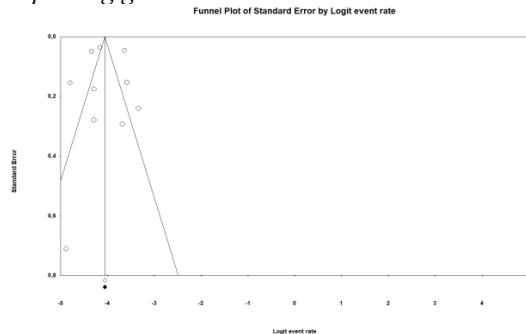

Results based on 10 studies retained (open circles). No additional study identified by “trim and fill” analysis (Egger et al, 1997; Duval & Tweedie, 2000). Egger’s test does not show publication bias ( $p=0.99$ ).

**Table S11. Meta-analysis of gBRCA1 carriers among unaffected individuals**

| Data |                                      |        |             |            |                  |              |
|------|--------------------------------------|--------|-------------|------------|------------------|--------------|
|      | Study Name                           | Events | Sample size | Event rate | Logit event rate | Std Err      |
| 1    | Genome-wide population exome 1       | 95     | 50726       | 0.002      | -6.278           | <b>0.103</b> |
| 2    | Genome-wide population exome 2       | 86     | 30223       | 0.003      | -5.859           | <b>0.108</b> |
| 3    | Bio bank data exome and whole genome | 332    | 125747      | 0.003      | -5.934           | <b>0.055</b> |
| 4    | Case-control large panel 1           | 37     | 32544       | 0.001      | -6.778           | <b>0.164</b> |
| 5    | Case-control large panel 2           | 58     | 50703       | 0.001      | -6.772           | <b>0.131</b> |

## Results

| Study name                              | Event rate and 95% CI | Statistics for each study |             |             |          |
|-----------------------------------------|-----------------------|---------------------------|-------------|-------------|----------|
|                                         |                       | Event rate                | Lower limit | Upper limit | Z-Value  |
| Genome-wide population / Manickam 2018  |                       | 0.002                     | 0.002       | 0.002       | -61.137  |
| Genome-wide population / Abul-Husn 2020 |                       | 0.003                     | 0.002       | 0.004       | -54.258  |
| Biobank data / Karczewski 2020          |                       | 0.003                     | 0.002       | 0.003       | -107.984 |
| Case-control large panel / Hu 2020      |                       | 0.001                     | 0.001       | 0.002       | -41.207  |
| Case-control large panel / Dorling 2021 |                       | 0.001                     | 0.001       | 0.001       | -51.546  |
| Total                                   |                       | 0.002                     | 0.001       | 0.003       | -35.571  |

## Heterogeneity analysis:

$I^2$  statistic =93%,  $p$  value 0.000 ( $I^2 > 40\%$   $p < 0.05$ ) → heterogeneity → random-effects model

## Forest plot:

gBRCA1=0.182%, 95% CI 0.128-0.257

## Selection Bias

| N studies | Eggers Test | Duval & Tweedie (DT) Method | Random        |                      |
|-----------|-------------|-----------------------------|---------------|----------------------|
|           |             |                             | DT Event rate | DT event rate IC 95% |
| 5         | 0.22        | 0                           | 0.00202       | 0.00147–0.00278      |

### Funnel plot log gBRCA1

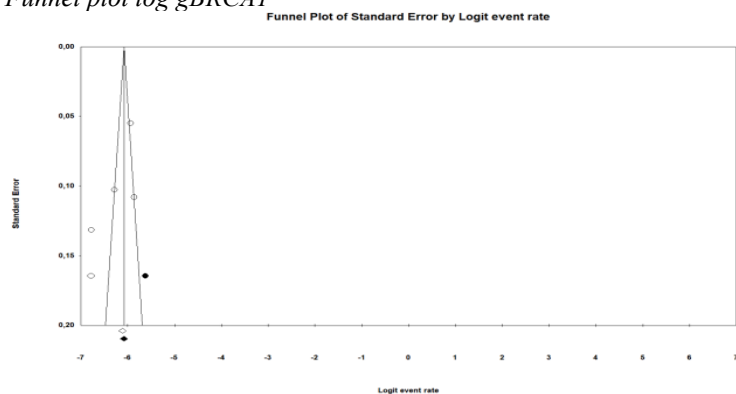

Results based on 5 studies or databases retained (open circles). 1 additional study identified by “trim and fill” analysis (Egger et al, 1997; Duval & Tweedie, 2000). Egger’s test does not show publication bias ( $p=0.22$ ).

**Table S12. Meta-analysis of gBRCA2 carriers among unaffected individuals**

### Data

|   | Study Name                           | Events | Sample size | Event rate | Logit event rate | Std Err      |
|---|--------------------------------------|--------|-------------|------------|------------------|--------------|
| 1 | Genome-wide population exome 1       | 172    | 50726       | 0.003      | -5.683           | <b>0.076</b> |
| 2 | Genome-wide population exome 2       | 131    | 30223       | 0.004      | -5.437           | <b>0.088</b> |
| 3 | Bio bank data exome and whole genome | 447    | 125747      | 0.004      | -5.636           | <b>0.047</b> |
| 4 | Case-control large panel 1           | 78     | 32544       | 0.002      | -6.031           | <b>0.113</b> |
| 5 | Case-control large panel 2           | 135    | 50703       | 0.003      | -5.926           | <b>0.086</b> |

### Results



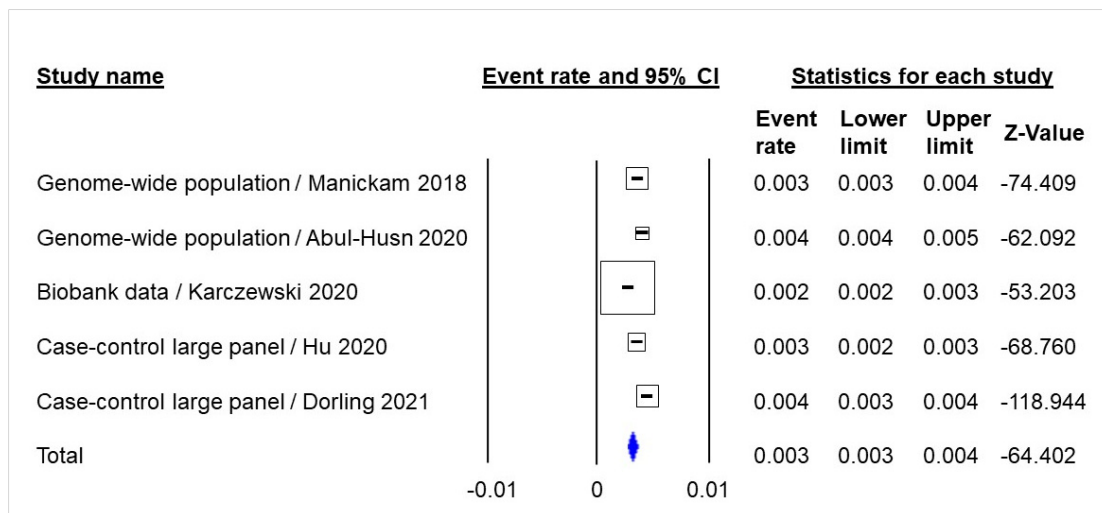

#### Heterogeneity analysis:

$I^2$  statistic =84.7%, p value 0.000 ( $I^2 > 40\%$   $p < 0.05$ ) → heterogeneity → random-effects model

#### Forest plot:

gBRCA2=0.323%, 95% CI 0.271-0.384

#### Selection Bias

|           |             |                            | Random        |                      |
|-----------|-------------|----------------------------|---------------|----------------------|
| N studies | Eggers Test | Duval &Tweedie (DT) Method | DT Event rate | DT event rate IC 95% |
| 5         | 0.42        | 0                          | 0.00323       | 0.00271-0.00384      |

#### Funnel plot log gBRCA2

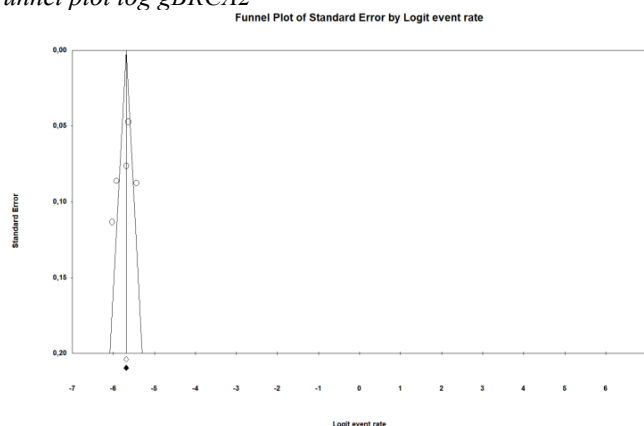

Results based on 5 studies or databases retained (open circles). No additional study identified by “trim and fill” analysis (Egger et al, 1997; Duval&Tweedie,2000). Egger test do not show publication bias publication bias ( $p=0.42$ ).
